# Supplementary material for: Larval habitat diversity, physicochemical characteristics and their effect on the larval density of malaria vectors in the city of Accra, Ghana
Source: Research Square preprint supplement (doi:10.21203/rs.3.rs-6362273/v1), 2025-04-25
Supplement: Supplementary file 1 [file 8708e590729be7049f4c4724.docx]

| Table S1: Principal Component Analysis (PCA) of Physicochemical Variables and *Anopheles gambiae* Larval Densities, showing dimension 1 and 2 | | |
| --- | --- | --- |
| Variable | PC1 | PC2 |
| *An. gambiae* LD | 0.38 | -0.18 |
| pH | -0.12 | -0.86 |
| Temp. | 0.22 | -0.48 |
| EC | 0.64 | 0.03 |
| TDS | 0.62 | 0.09 |

| Table S2: Logistic Regression Analysis of Factors Affecting *Anopheles* Larval Presence | | | |
| --- | --- | --- | --- |
|  | OR | 95% CI | *p-value* |
| *Season* | | | |
| Wet season | 3.48 | 2.39 - 5.09 | < 0.001 |
| Dry season | Ref |  |  |
| *Habitat size* | | | |
| < 1m | 1.28 | 0.87 - 1.88 | 0.208 |
| 1 - 10m | Ref |  |  |
| > 10m | 0.48 | 0.29 - 0.81 | 0.006 |
| *Vegetation cover* | | | |
| < 24% | 2.18 | 1.18 - 4.04 | 0.013 |
| 25 - 49% | 2.36 | 1.21 - 4.69 | 0.013 |
| 50 - 74% | 2.13 | 0.93 - 4.94 | 0.075 |
| > 74% | Ref |  |  |
| Presence of Culex | 2.73 | 1.85 - 4.10 | < 0.001 |
| Absence | Ref |  |  |
| Presence of Algae | 1.56 | 1.10 - 2.20 | 0.012 |
| Absence | Ref |  |  |
